# Supplementary material for: Isosteviol prevents the development of isoprenaline-induced myocardial hypertrophy
Source: PubMed Central journal article supplement — Int J Mol Med. 2019 Sep 17;44(5):1932–42. doi: 10.3892/ijmm.2019.4342 (PMC6777692; doi:10.3892/ijmm.2019.4342), 2019-09-17

Figure S1. Effect of different concentrations of isosteviol sodium on Iso-induced hypertrophy of cardiomyocytes. The experiment was performed on cardiomyocytes isolated from rats. Concentration-response bar graph. Each bar represents the mean  $\pm$  standard error of the mean (n=5). \*P<0.05 vs. control group; #P<0.05 vs. Iso group. Iso, isoprenaline; STVNa, isosteviol sodium.

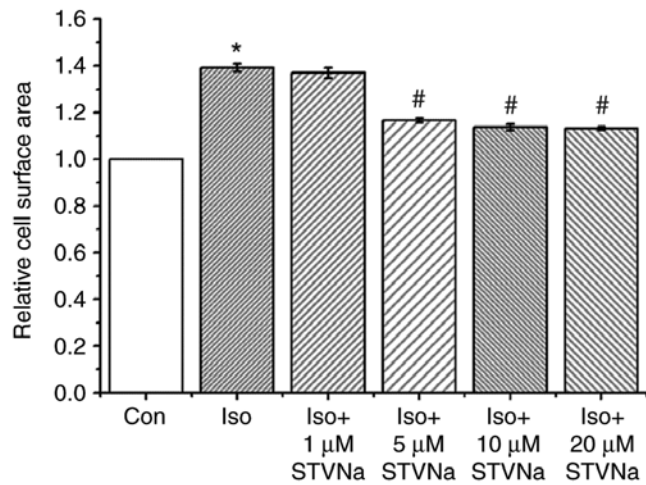

Supplement: Supplementary_Data.pdf [file Supplementary_Data.pdf]
